# Supplementary material for: Comparative study of the N-isobutyl-(2E,6Z)-dodecadienamide chemical and electrochemical syntheses
Source: Royal Society of Chemistry journal article supplement (doi:10.1039/b815745f), 2008-12-11

Spectra of the obtained compounds

**Ethyl-6-chloro-2-E-hexenoate (9)**

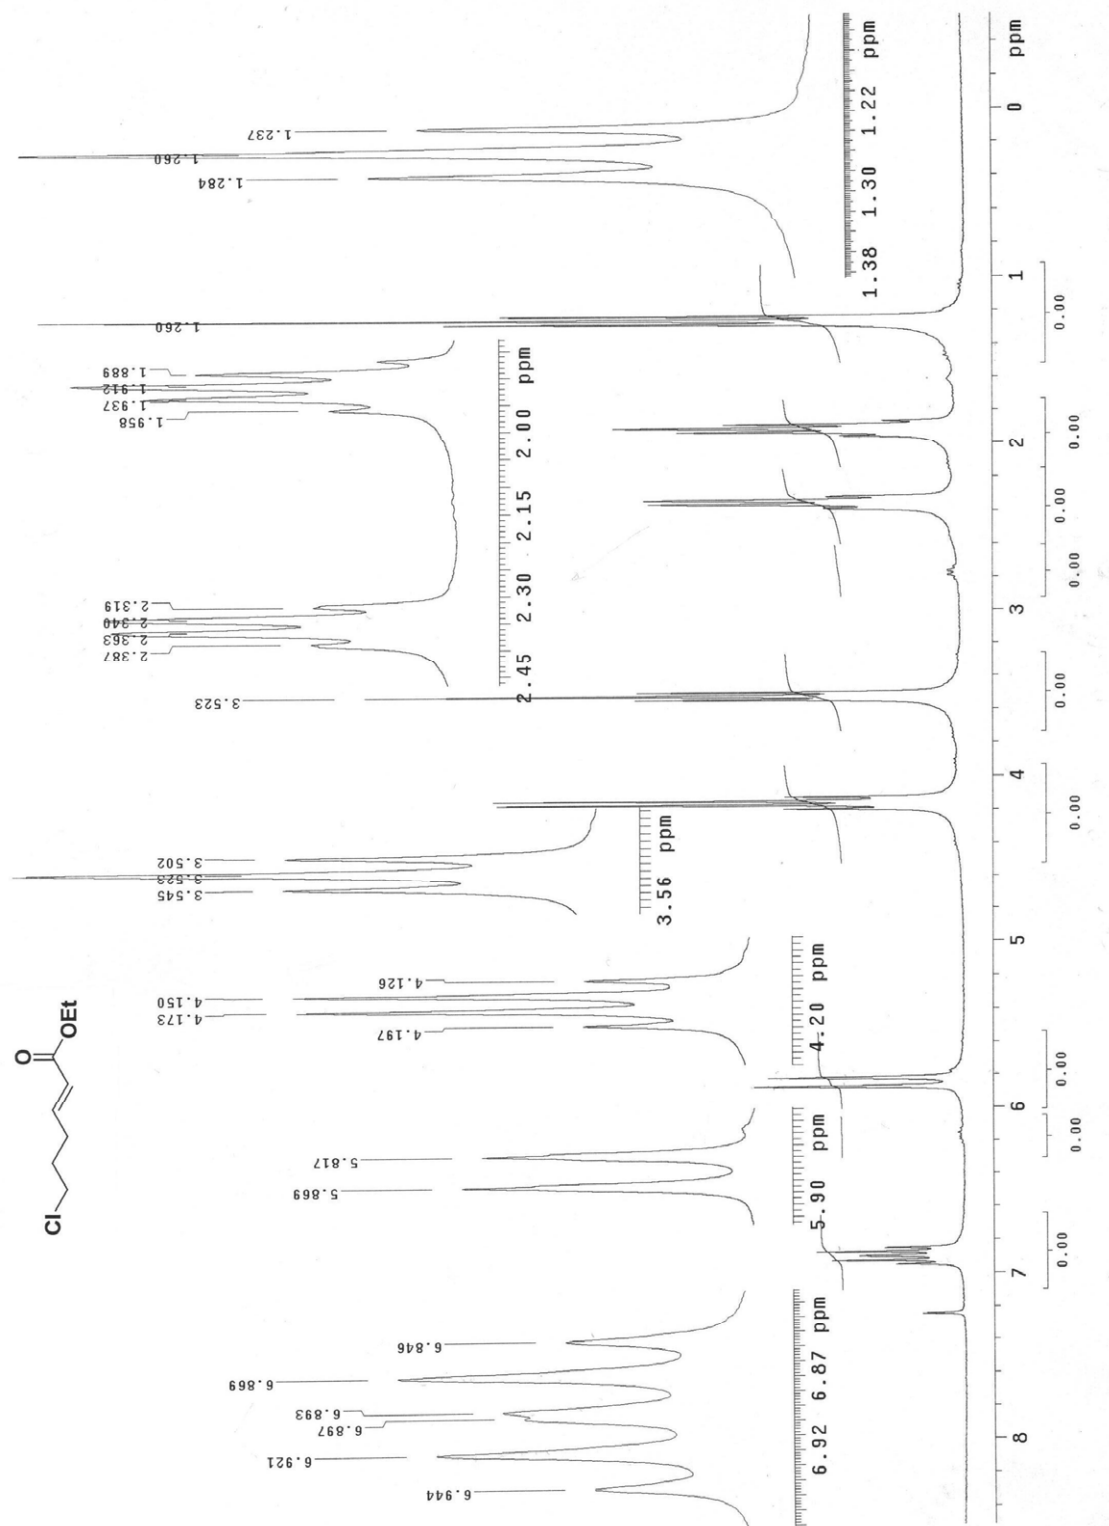

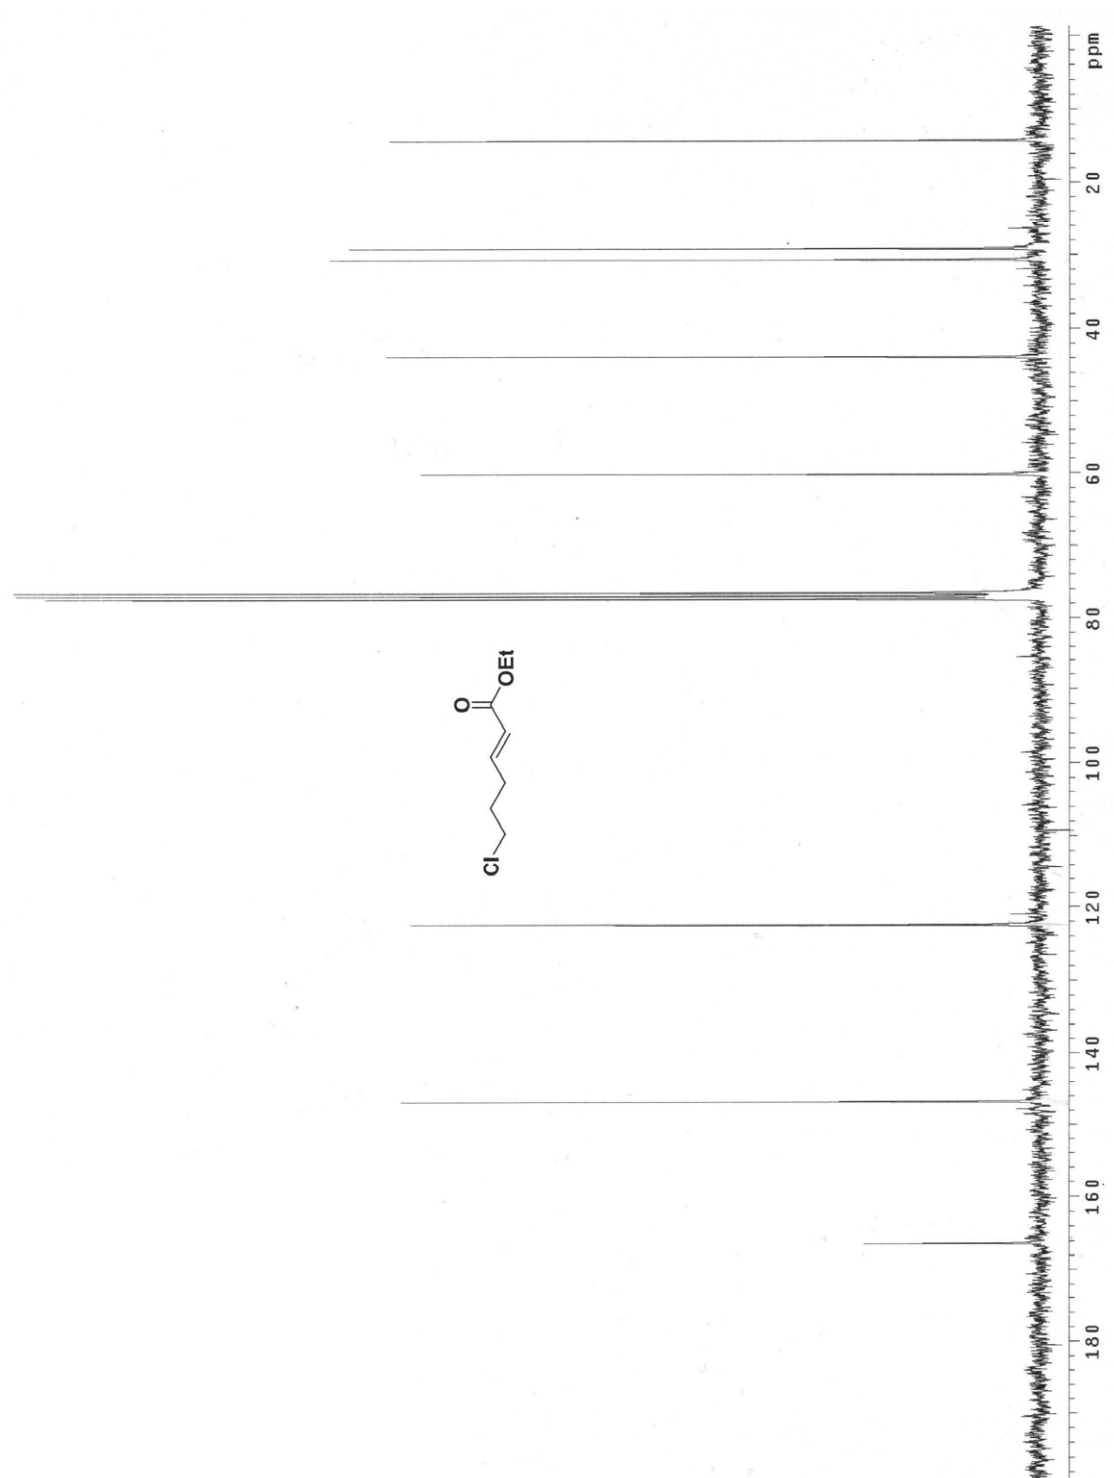

**6-chloro-(2E)-hexenoic acid (10)**

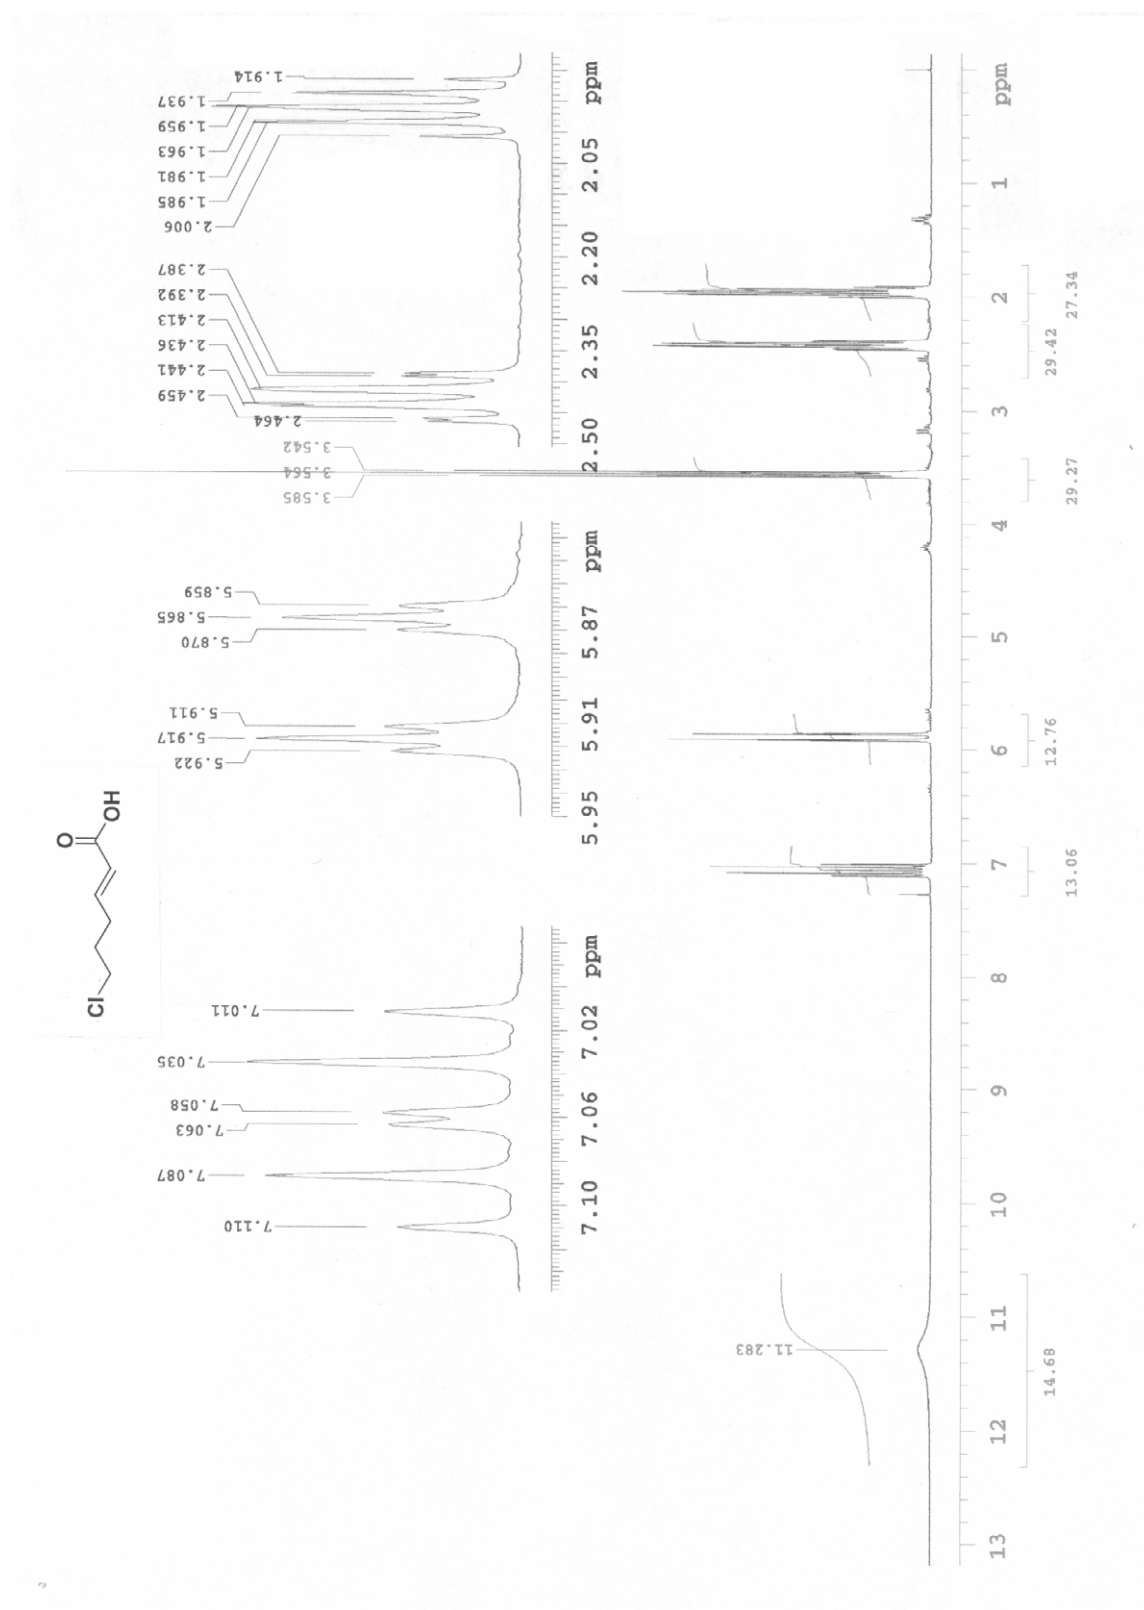

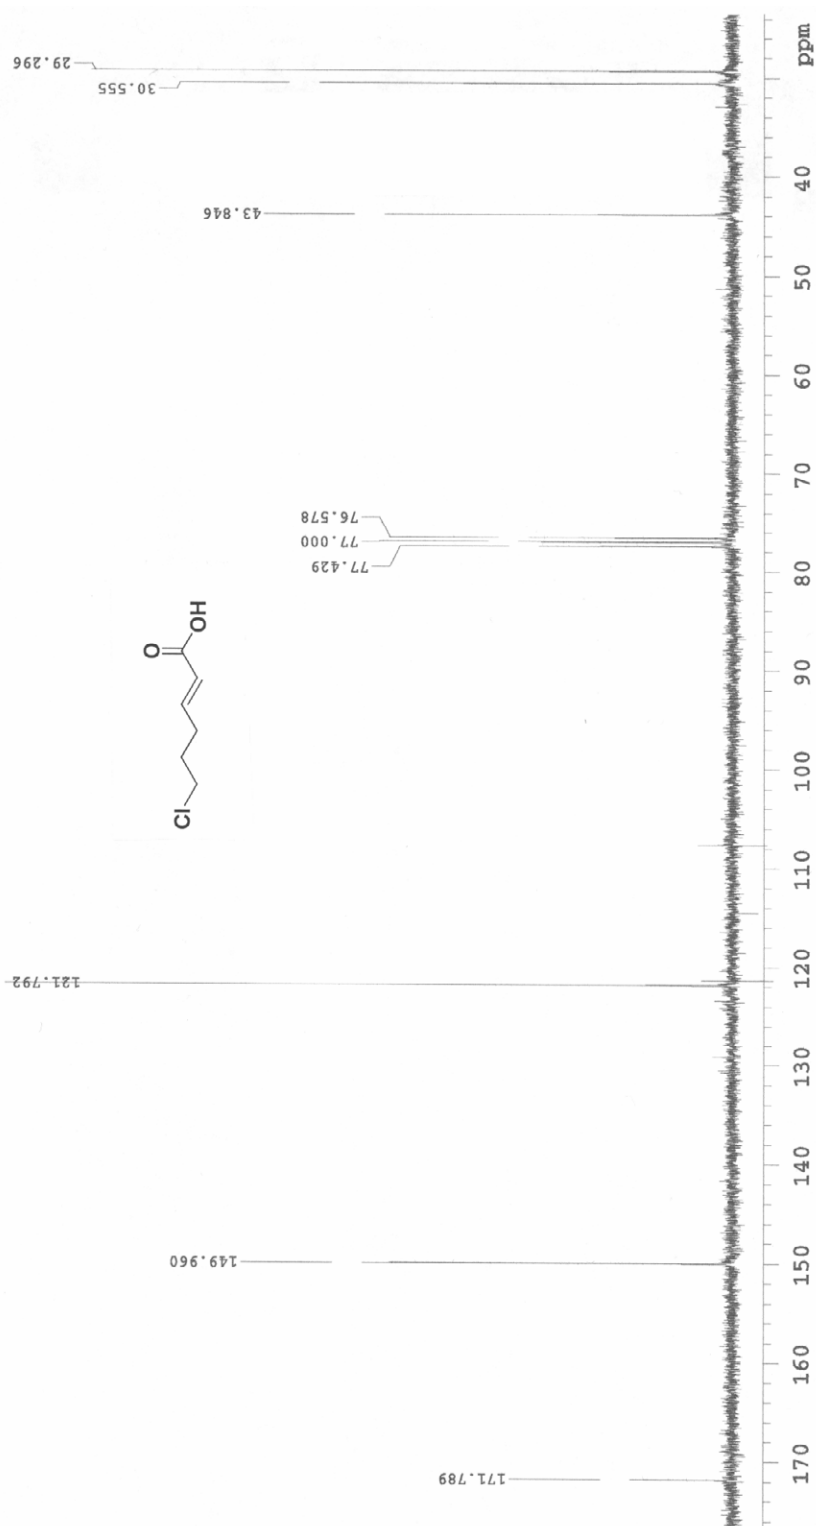

**N-isobutyl-6-chloro-(2E)-hexenamide (12)**

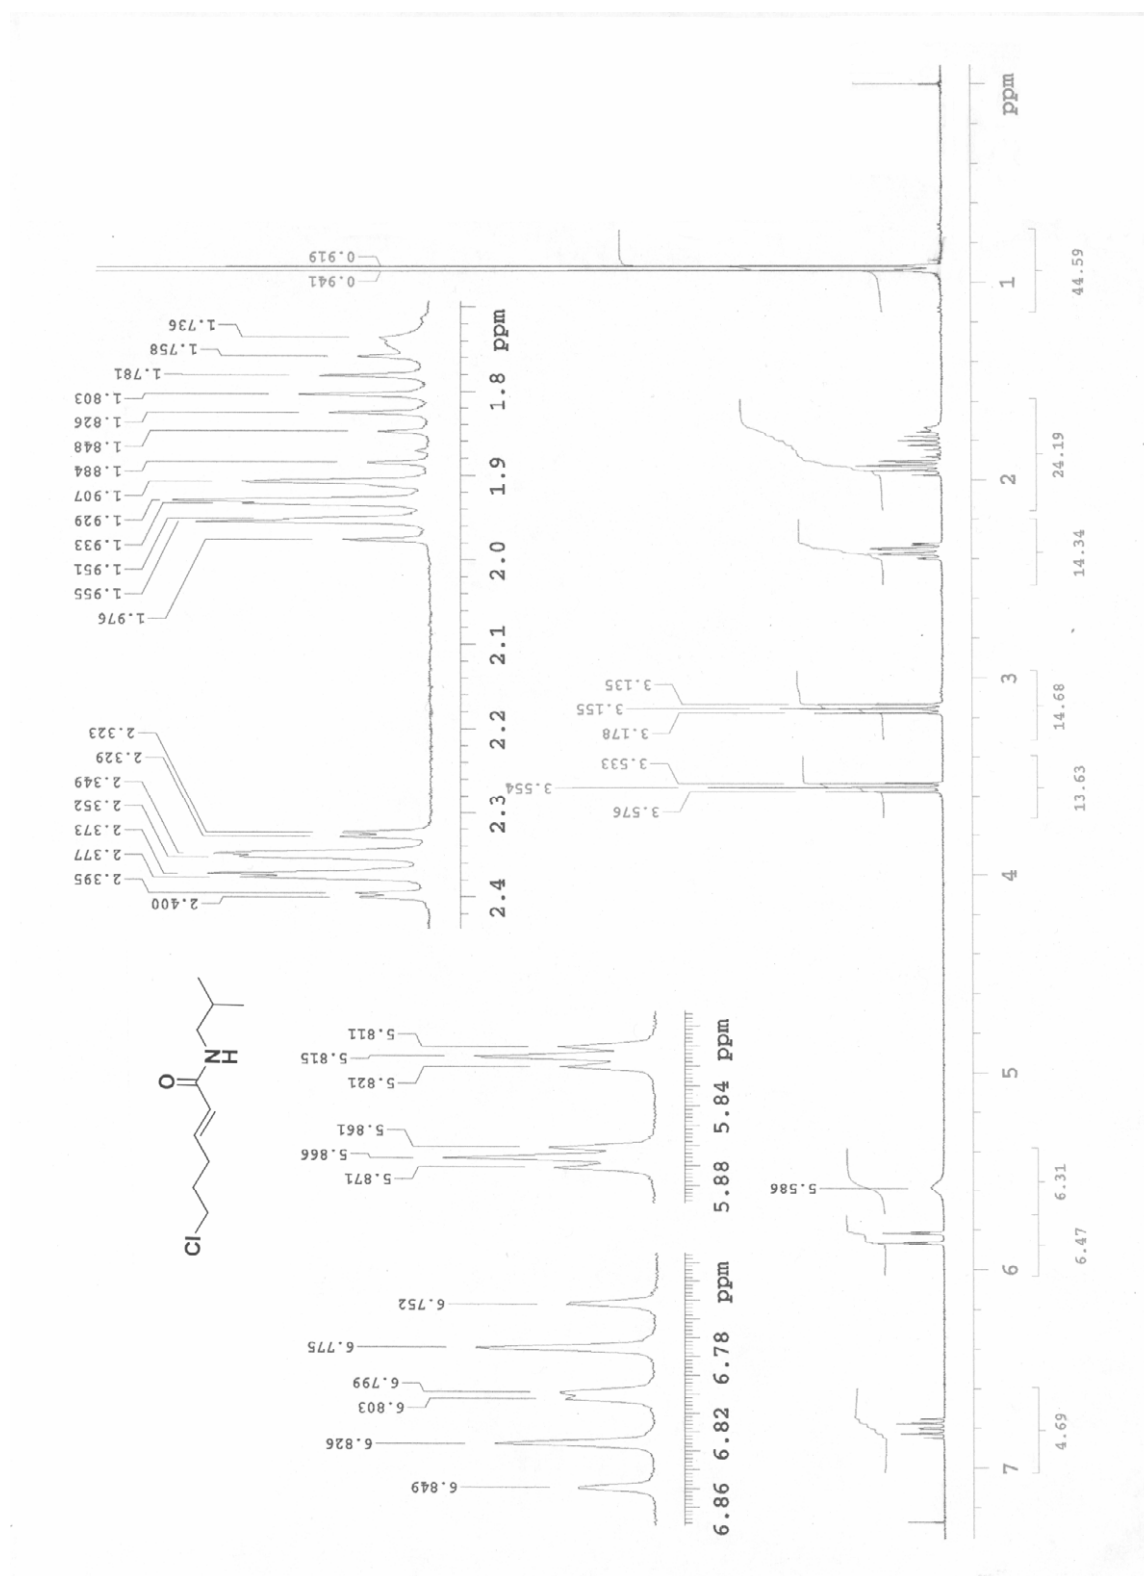

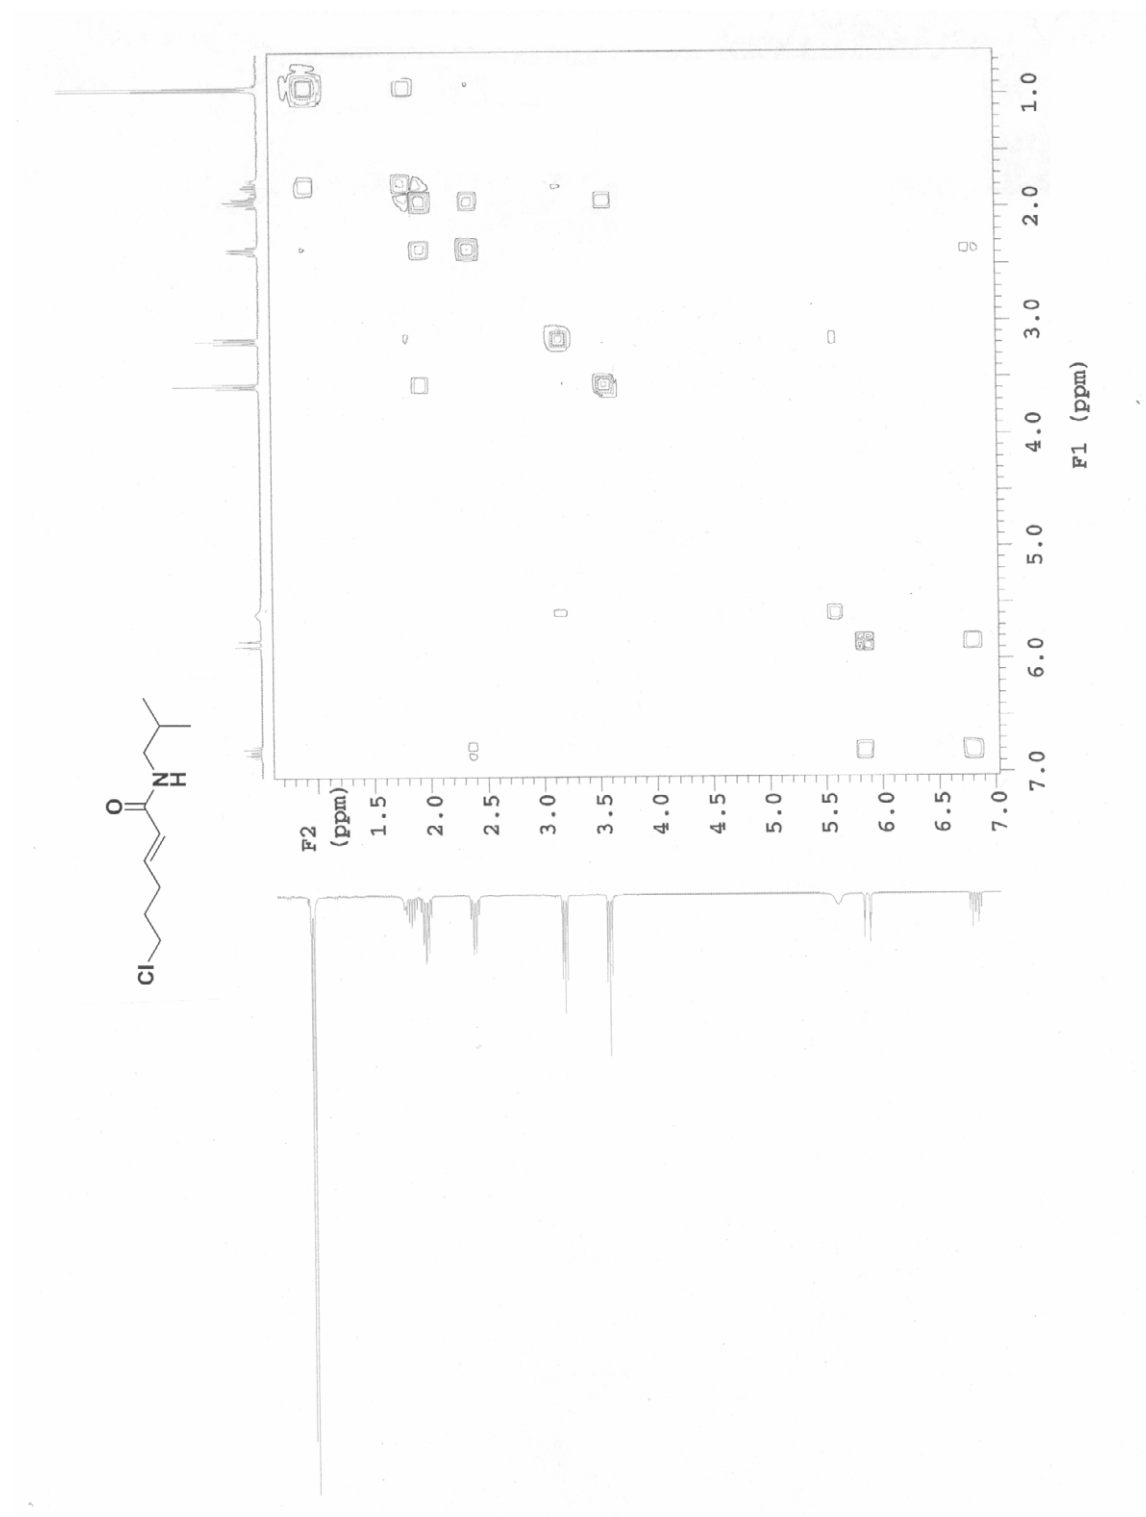

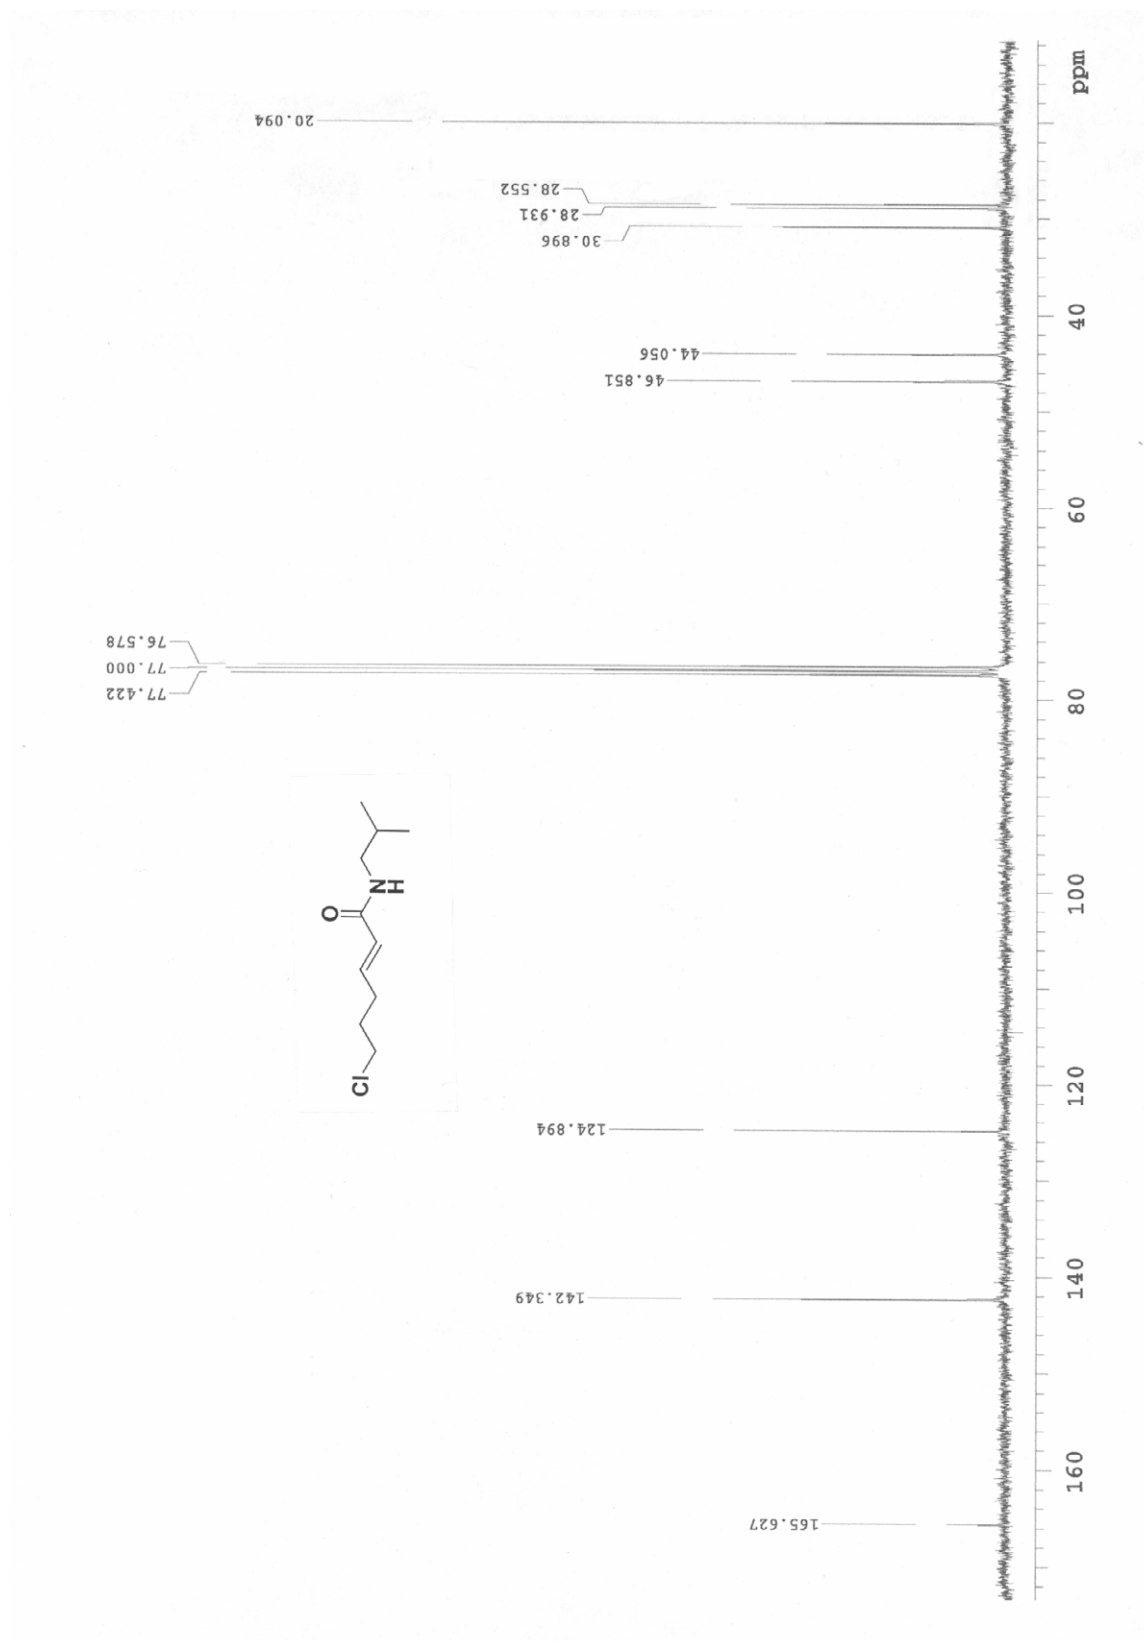

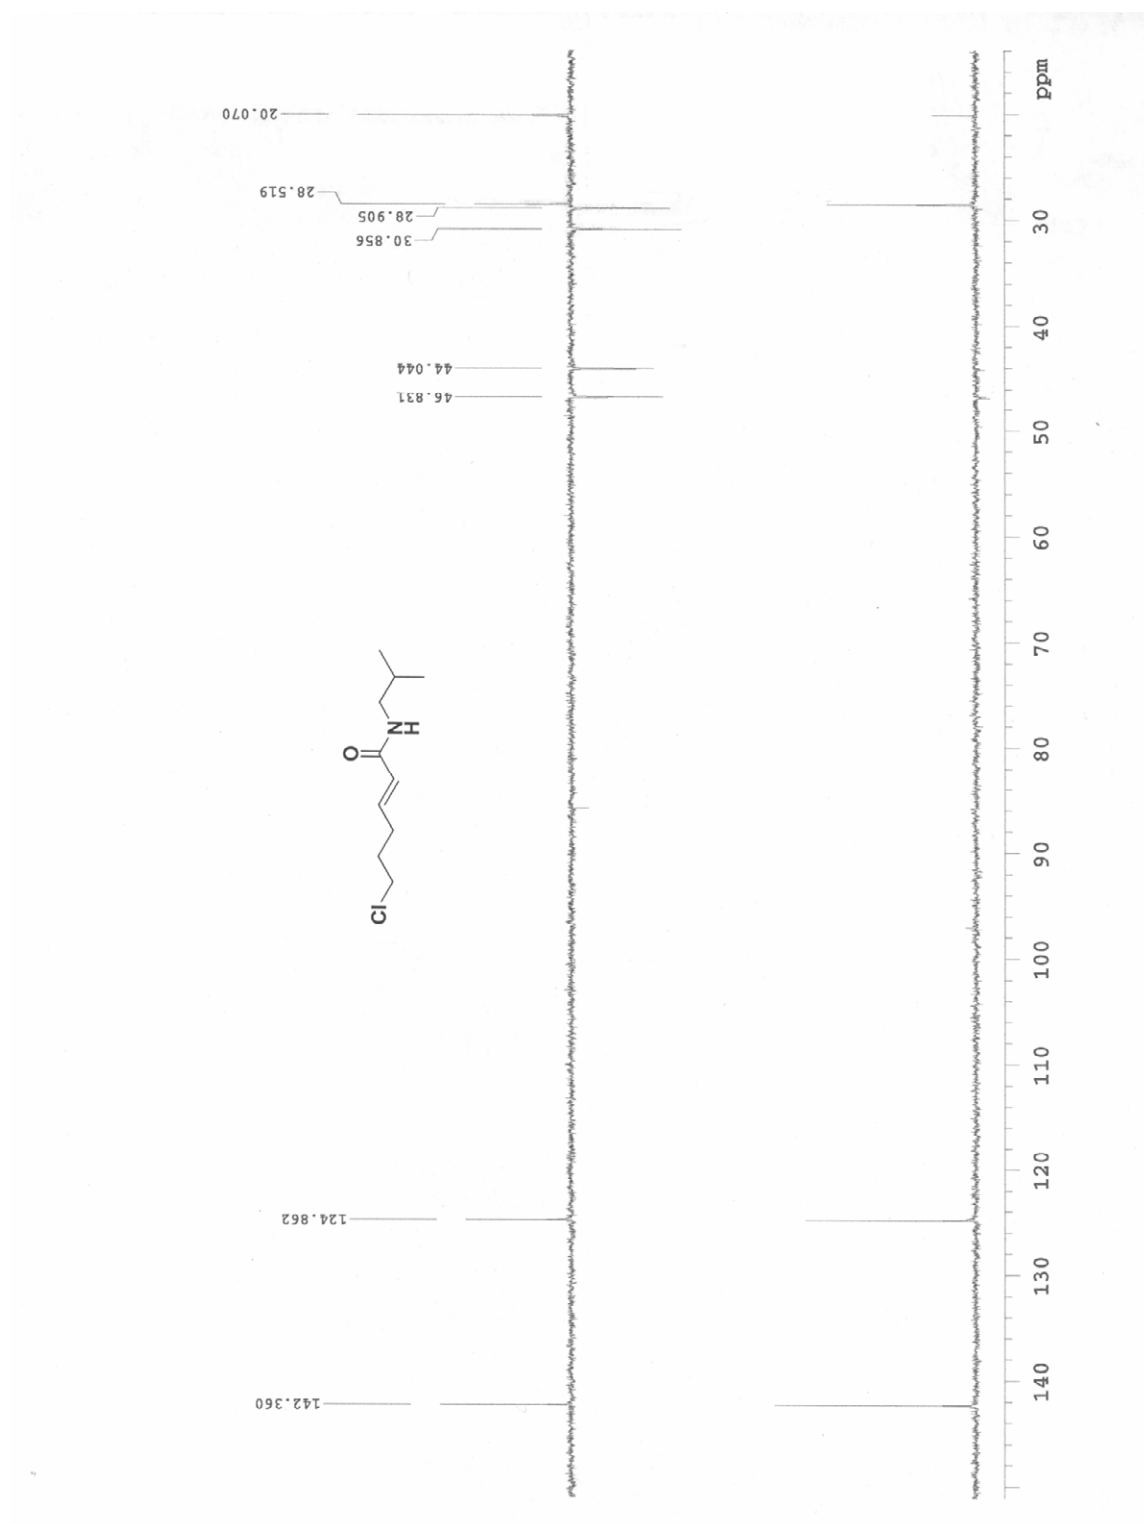



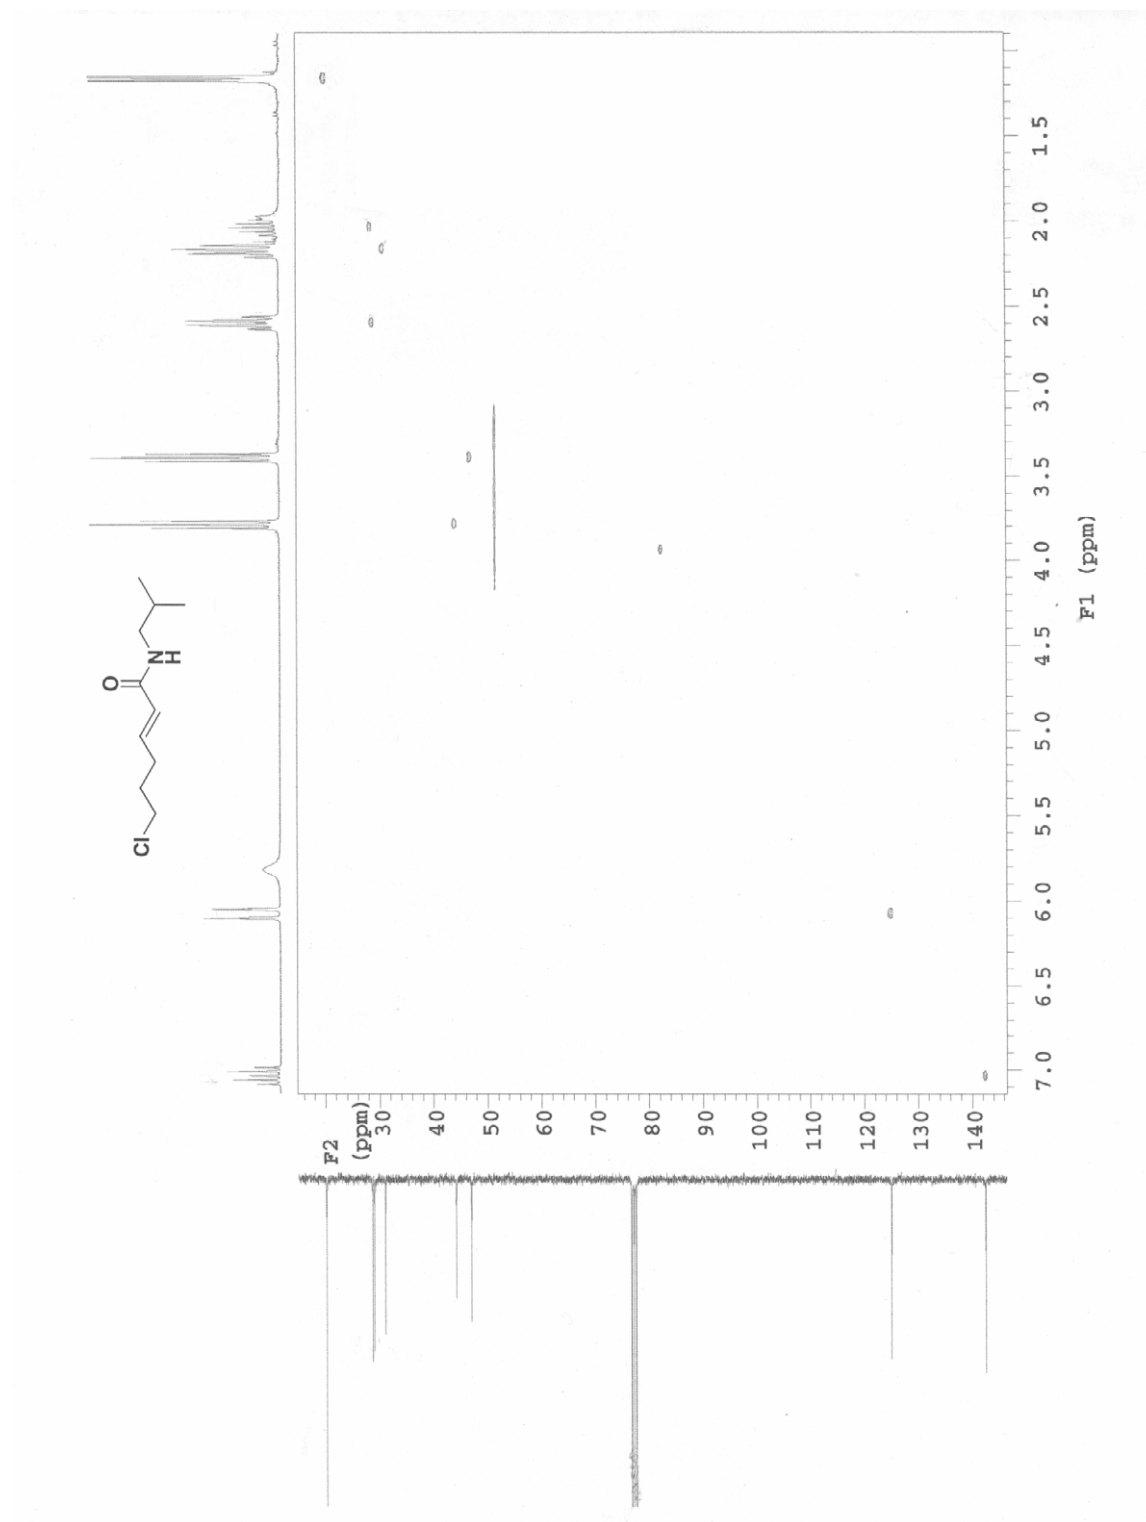

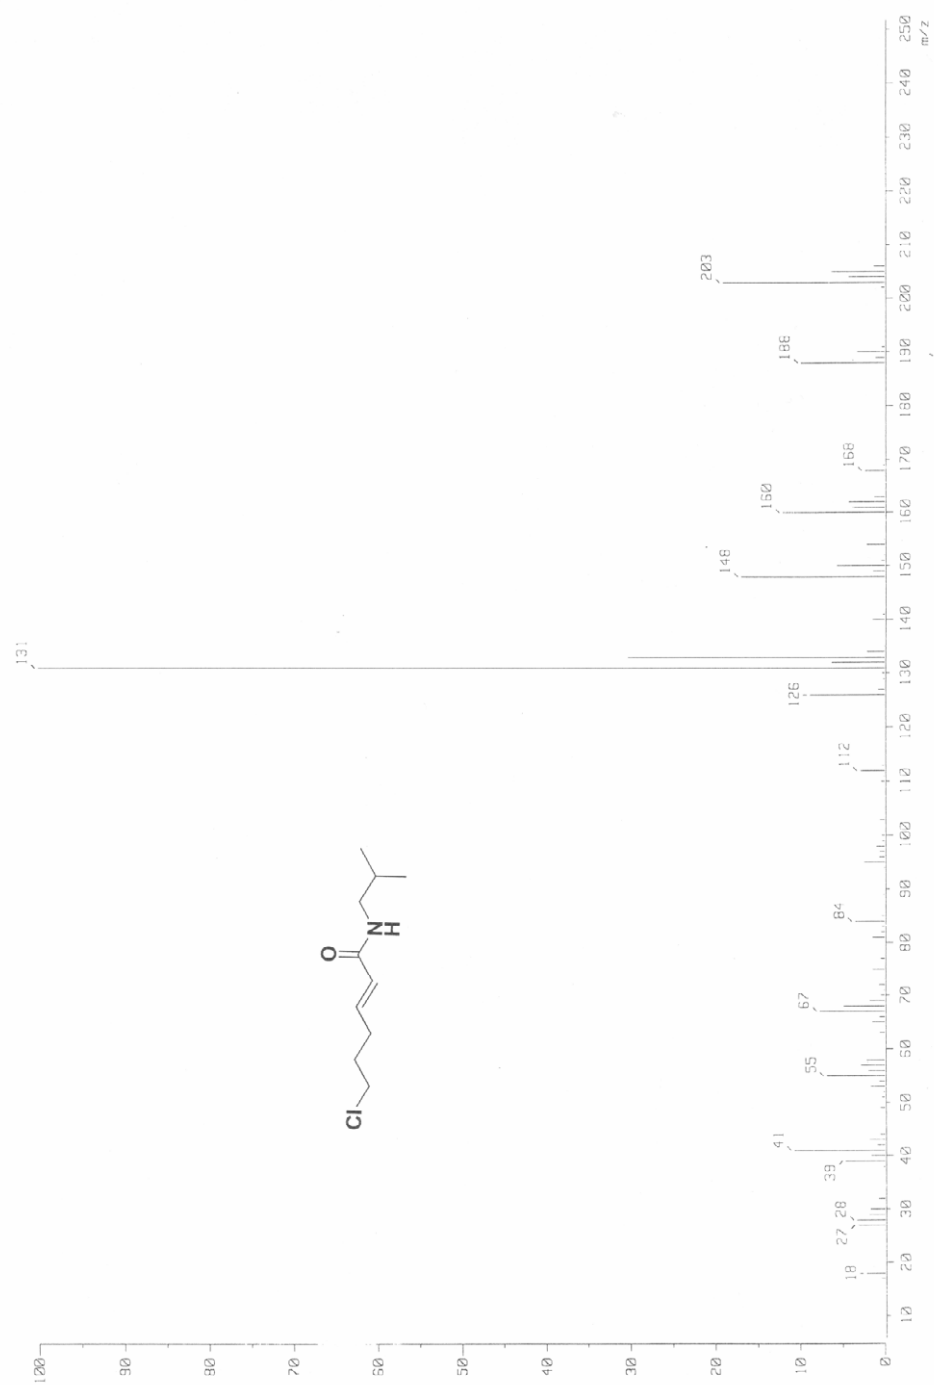

Wittig salt (14)

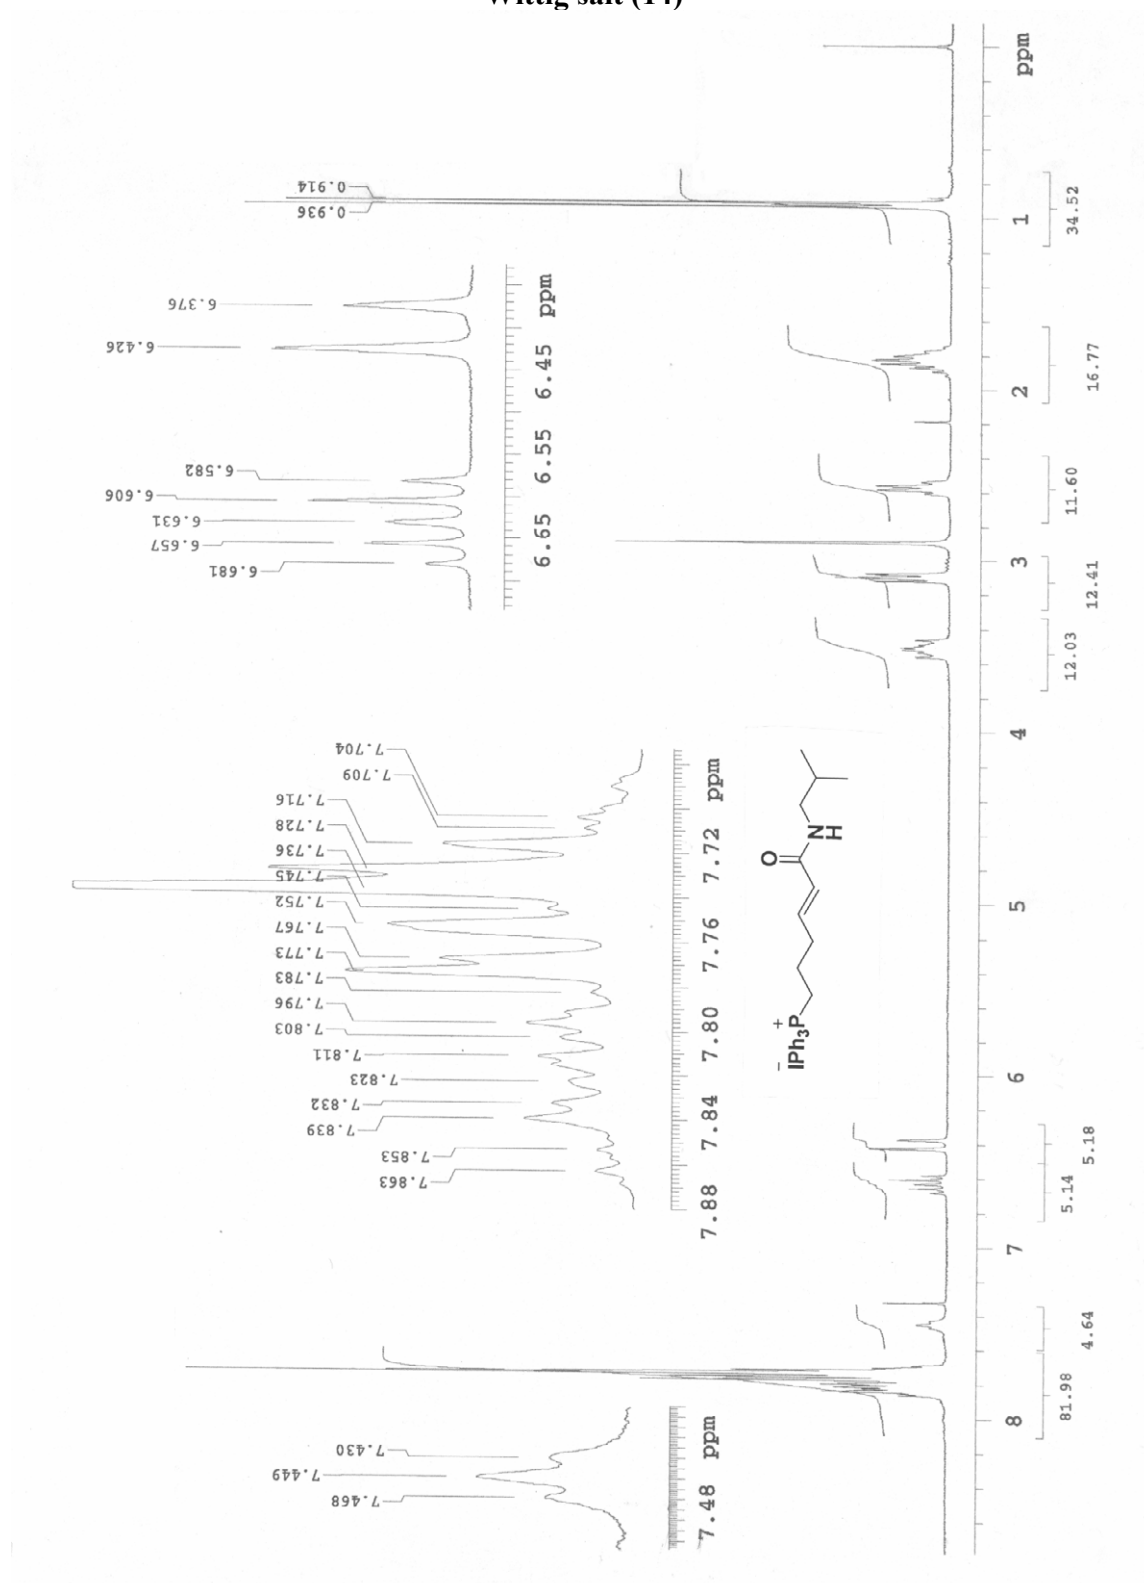

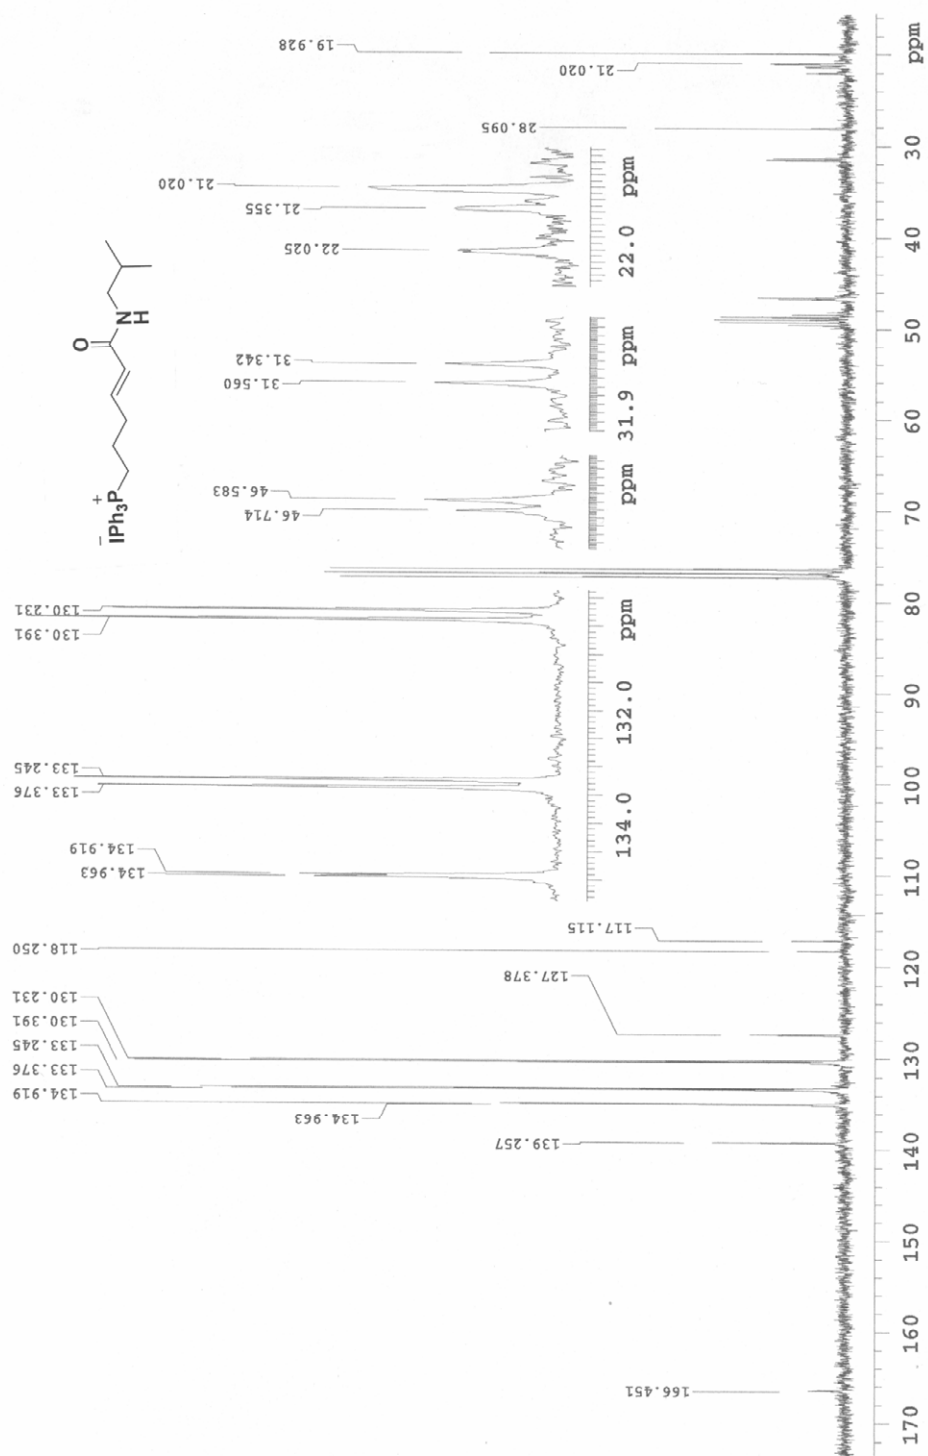

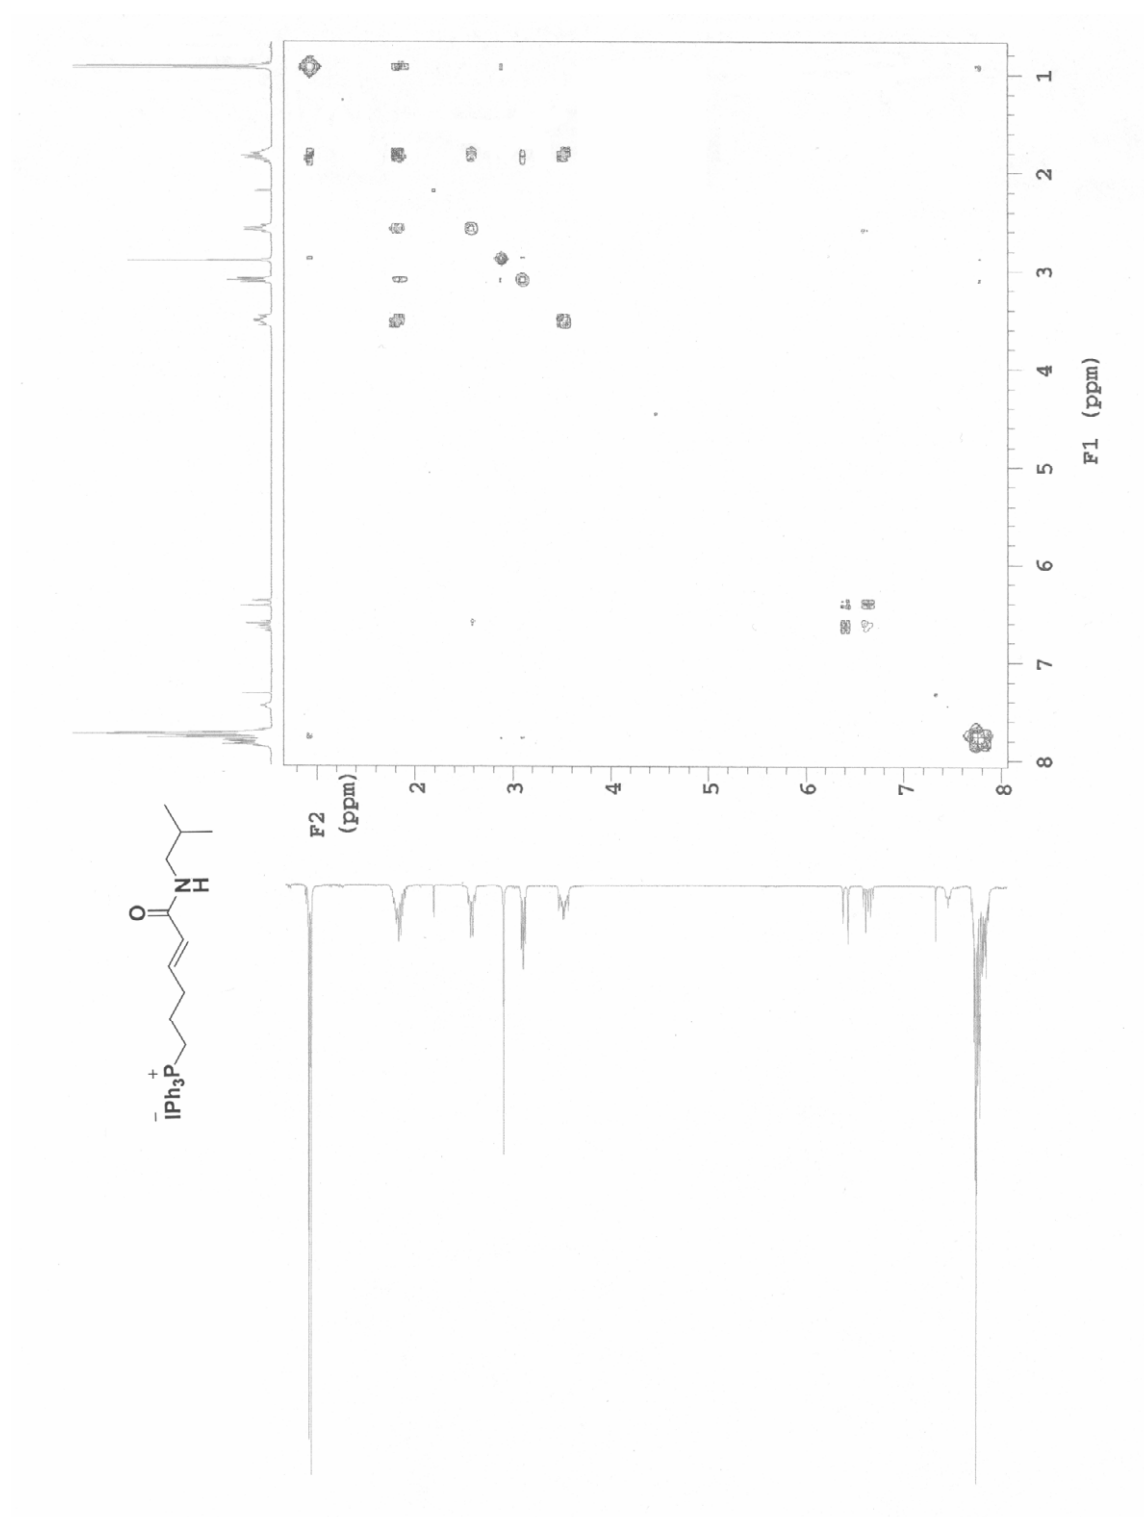

**N-Isobutyl-(2E, 6Z)-dodecadienamide (3)**

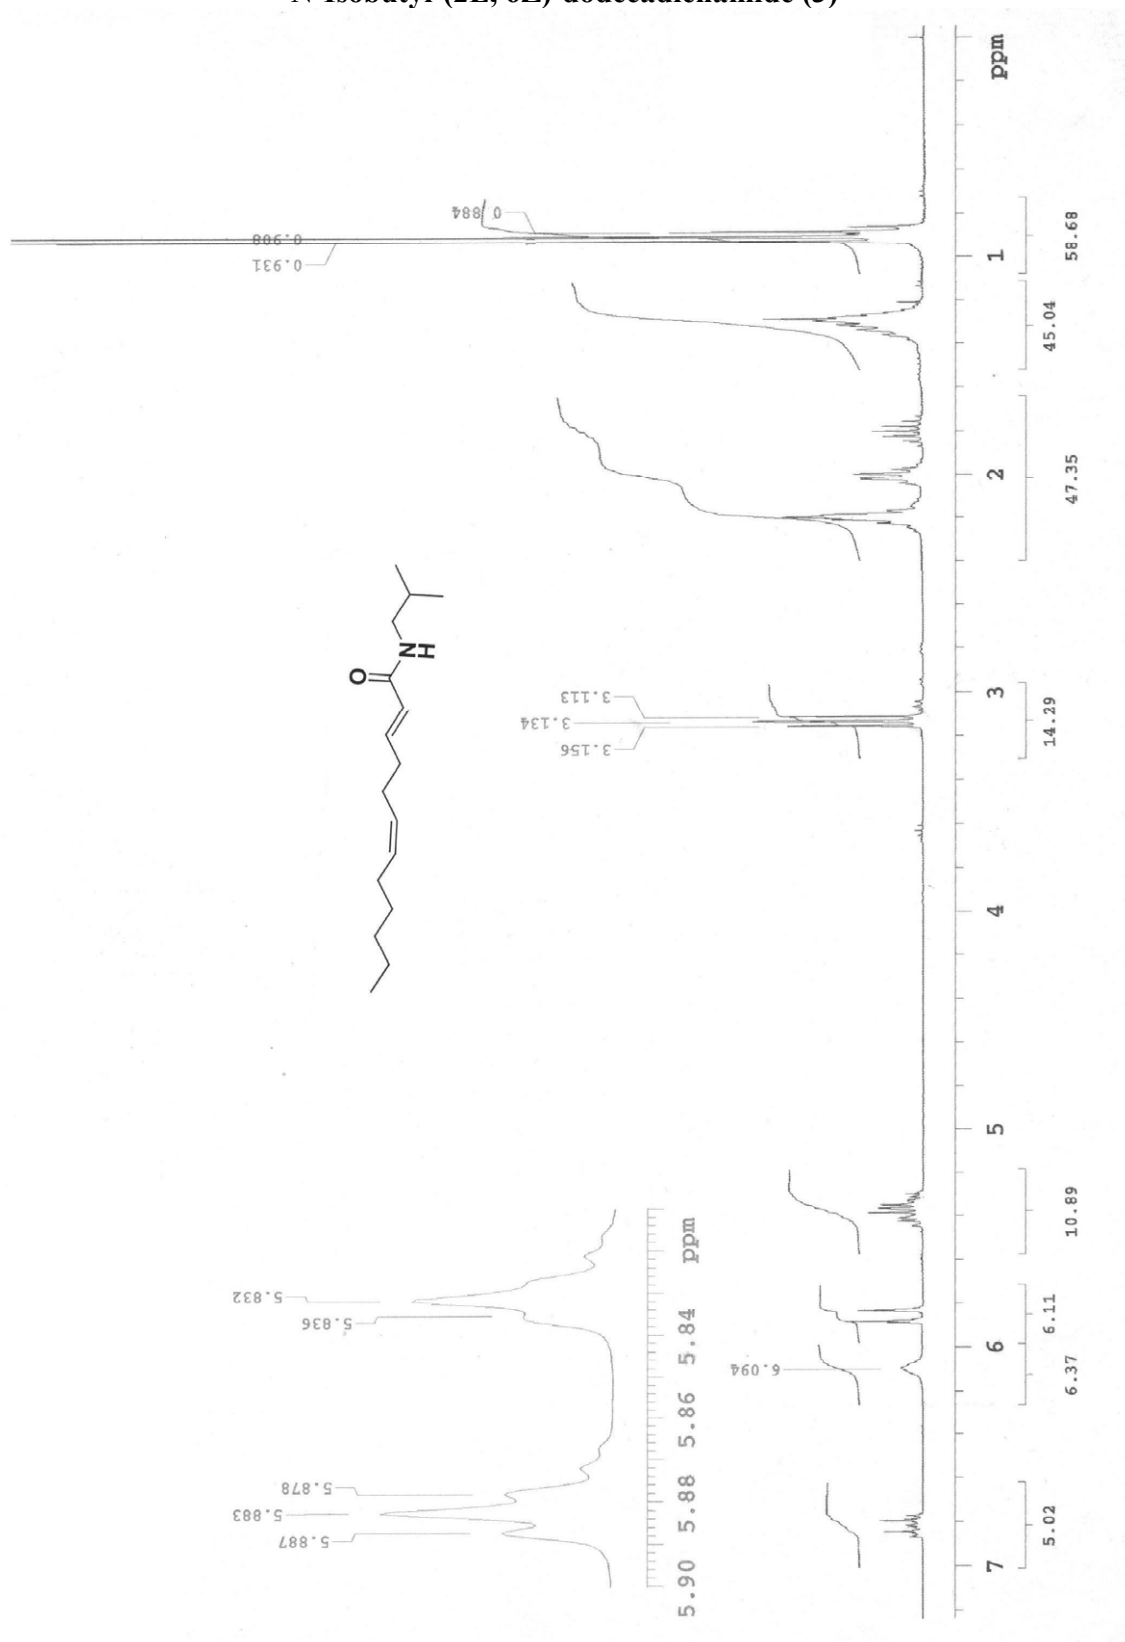

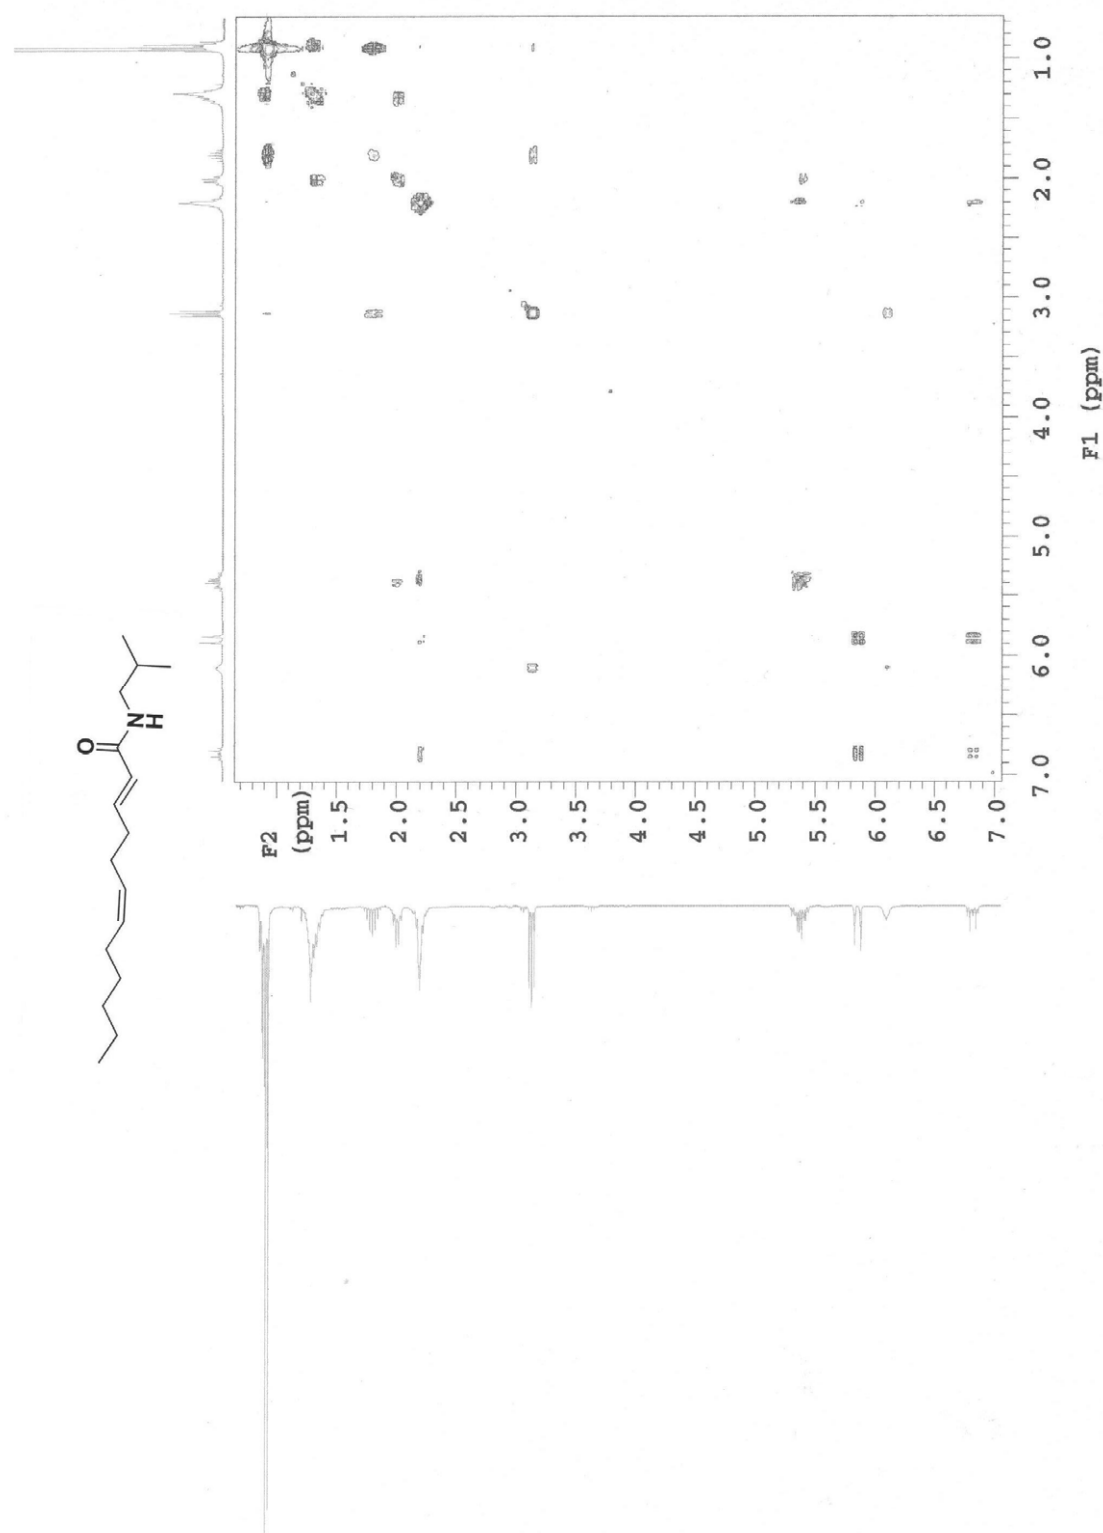

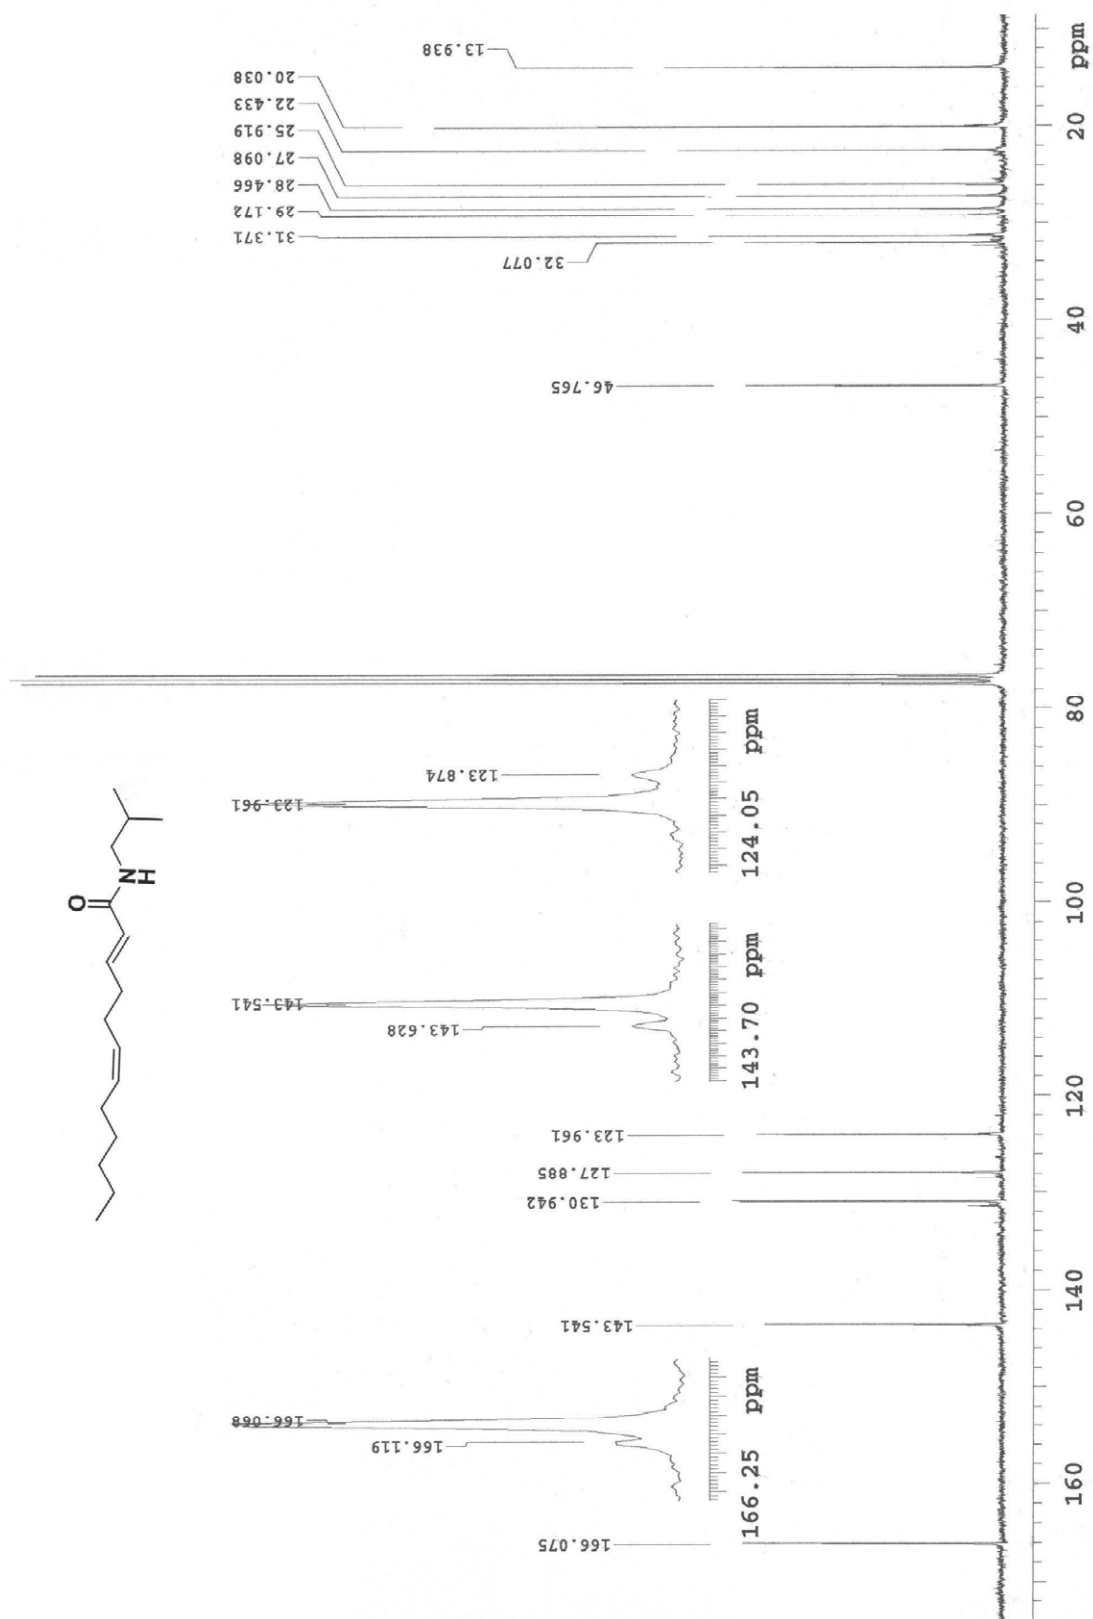



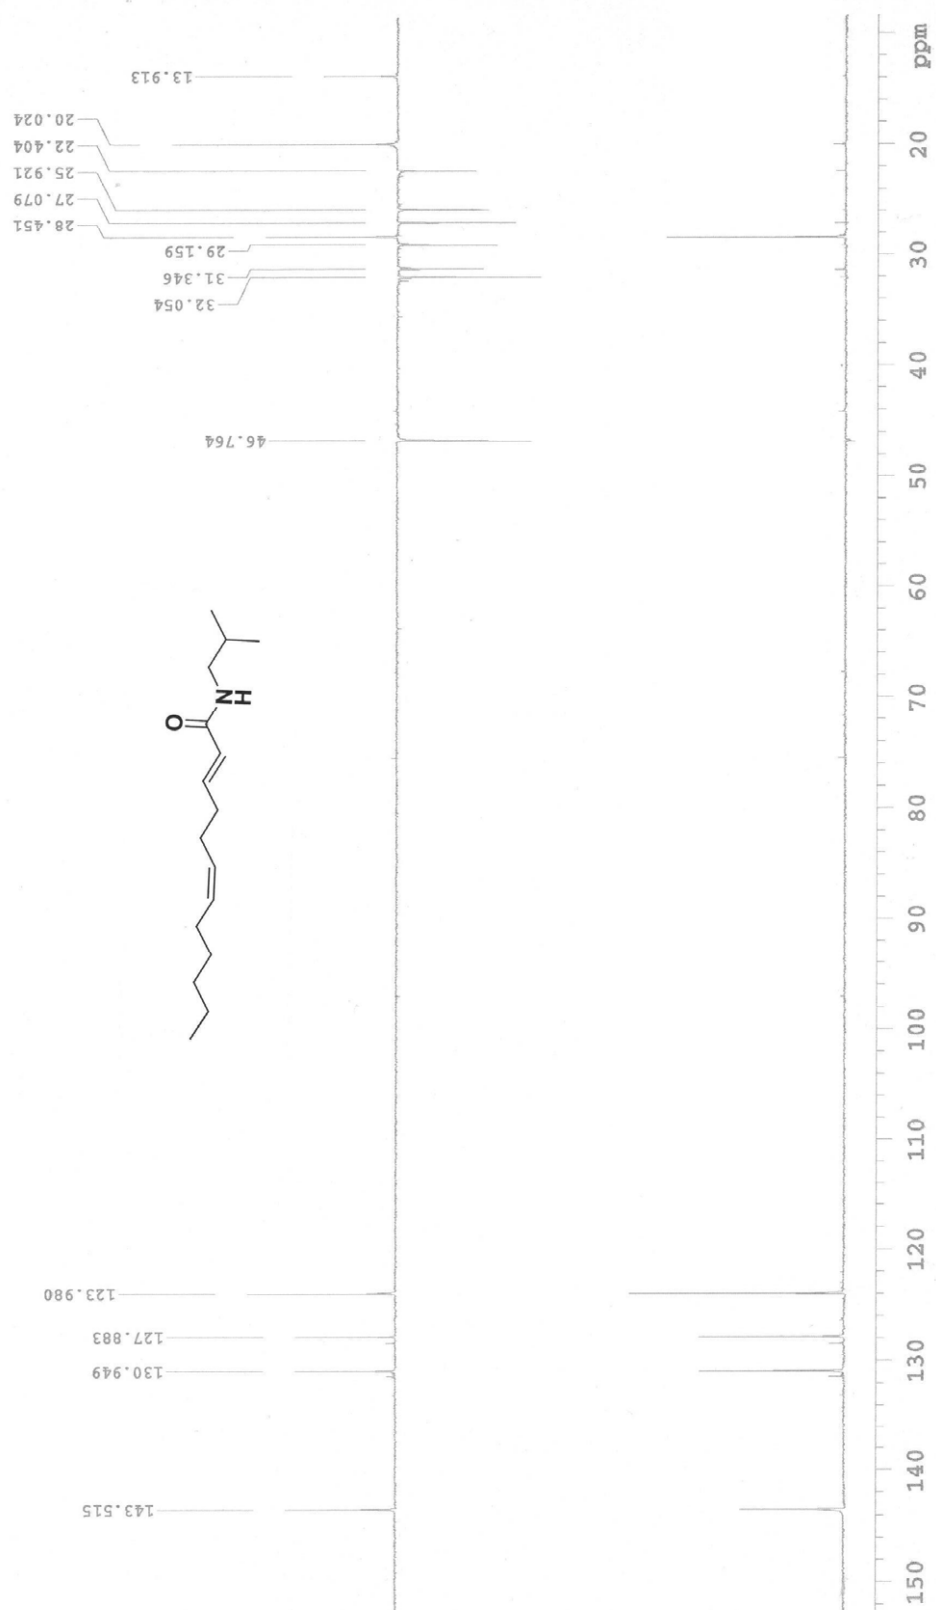

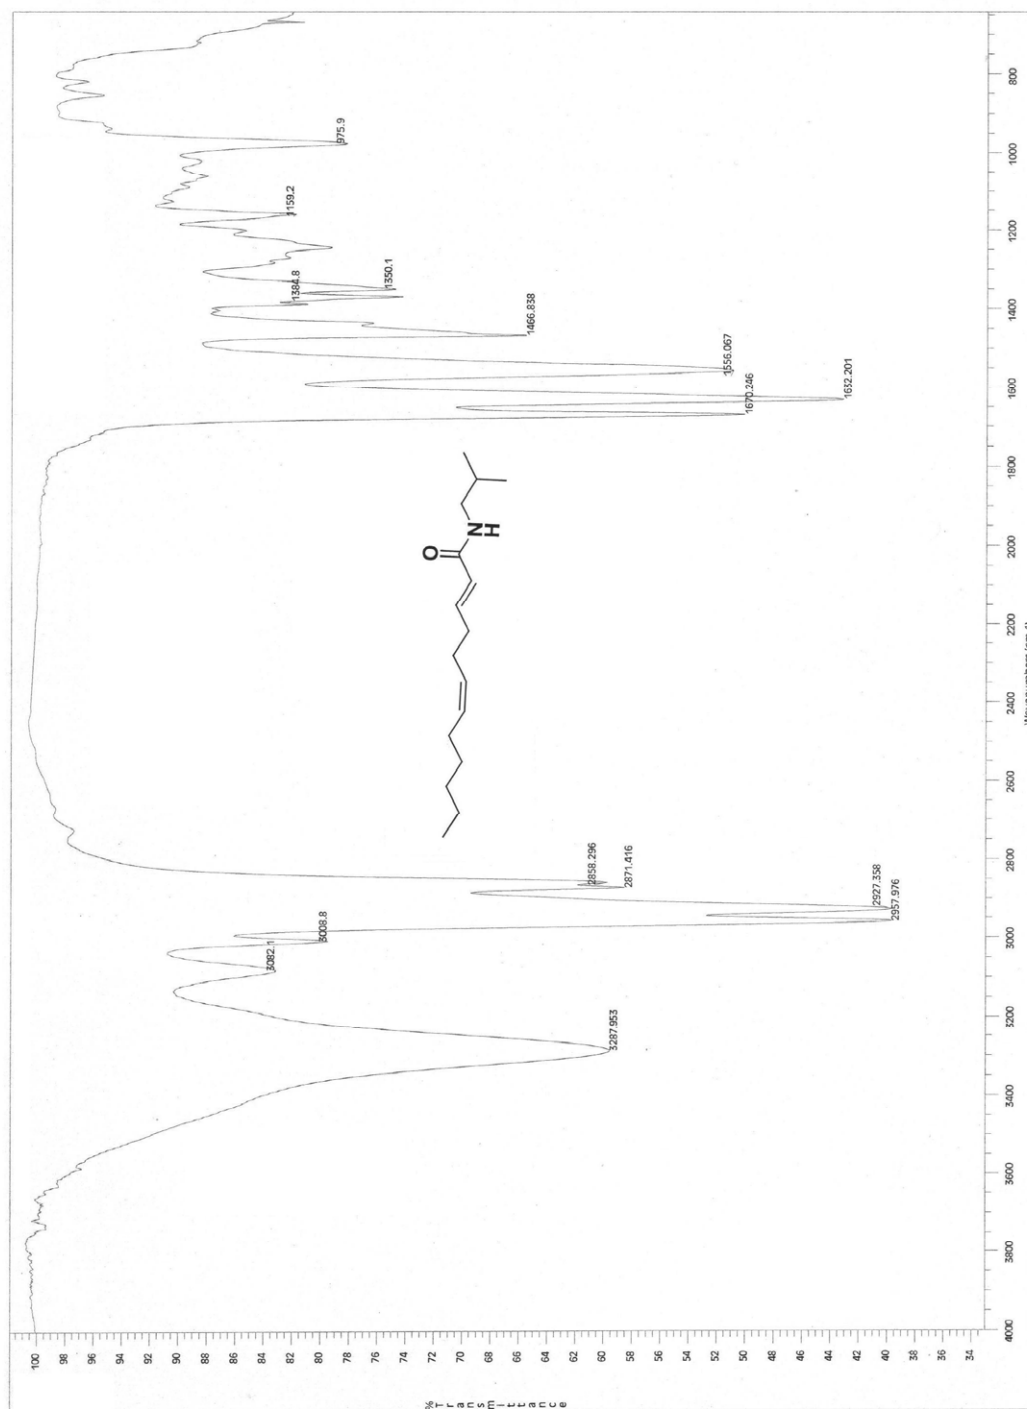

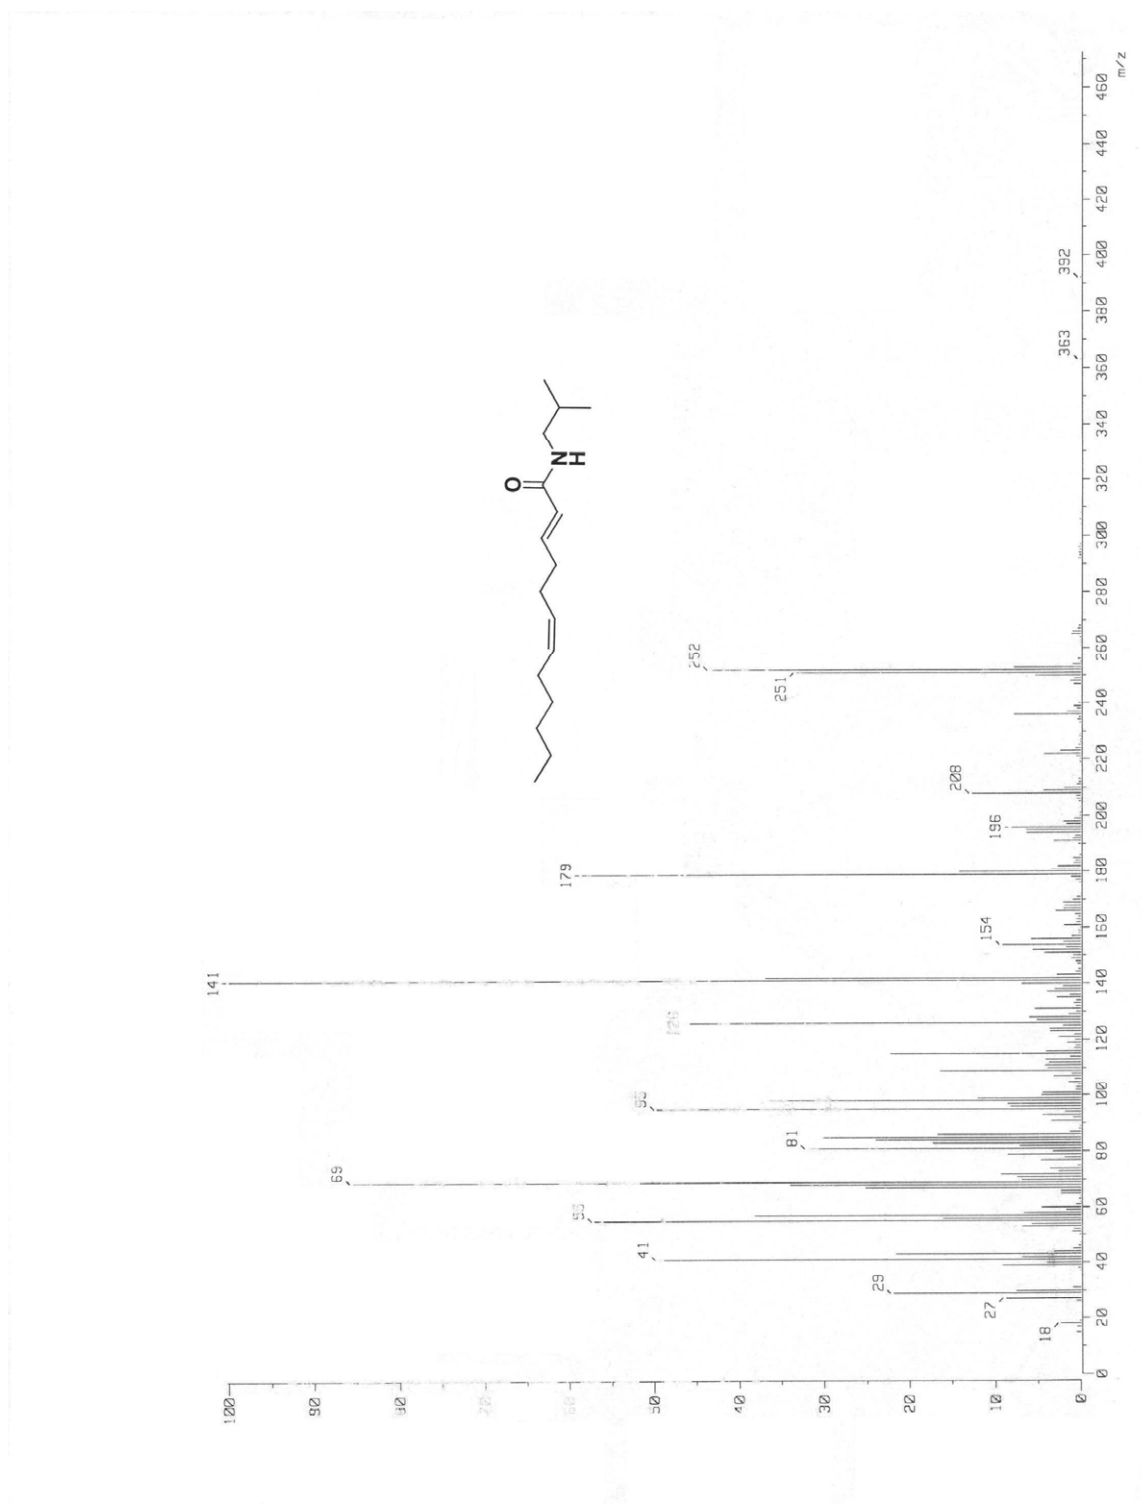

Supplement: b815745f.pdf [file b815745f.pdf]
